# Supplementary material
Source: PubMed Central journal article supplement (PMC123106)
Supplement: supp_142277999_2779Fig7.pdf [file supp_142277999_2779Fig7.pdf]

|         |     |                                                                 |      |
|---------|-----|-----------------------------------------------------------------|------|
| Sc Pol5 | 1   | MTGKVNRLDFKIASDLREERLHAAVALIKDLSALDLPDDAEWWSYVLNRLIKGLSSDRN     | 60   |
| Sp pol5 | 1   | MATKTQIELEFKITSNDKAIRLSSAACLIDSL-----NEELKYSLNRLTKGLSSGRE       | 54   |
| Sc Pol5 | 61  | SARLGFSLCLTEVINLAVNMPPGQRFKGLESTNEFLSTLSTILNVNVNEGTKKSMKQKDE    | 120  |
| Sp pol5 | 55  | SARIGFAVALTHELL-----T-----RTKEIRAT----HVIDLLVKHNTASG--N-IKQODE  | 98   |
| Sc Pol5 | 121 | RGILFGKLPGLKSLNNEPLFSEIFVKDLEKGNTEFIRFTECLIDLALKKMWIKFPCFFT     | 180  |
| Sp pol5 | 99  | RDFYFGLPGLCSIV---YSGILTHKES--TIELEQVVDILLQLSGKKNWLQDVCFYV       | 152  |
|         |     | TV                                                              |      |
| Sc Pol5 | 181 | LFQTMKMLLPFMDES-SAEKILLIYDKYDLTLTNEGLSTYLLIKYEGEESLIPSVLDLKN    | 239  |
| Sp pol5 | 153 | IYKLVCEIPEISFSSNAFLAVNKLLQTPAVSKSTXGVGLFLCLTRVFN-VKSEEVAMAN     | 211  |
|         |     | II                                                              |      |
|         |     | pol5-3                                                          |      |
|         |     | R                                                               |      |
| Sc Pol5 | 240 | PGMKDNDPLARGNPLLLTFVLRNSSVIFDANGGLKETKKQKNTNWNFRLHFVMSVLLPLF    | 299  |
| Sp pol5 | 212 | --WEPAPLHKSNLVTLISKIMRQA----DAS----ETGGQ-NSAWKCKIPMVWKYIFEEY    | 260  |
| Sc Pol5 | 300 | GNGKLENTSHISKRRKKTNNKQVNSICFPFVKMAVDESFFNEKASSERKYLGFLLIIDA     | 359  |
| Sp pol5 | 261 | -----QRTYSGLAFPHDFWAVVVDGIFSSSTSSLERKFWGFCIMEL                  | 302  |
|         |     | M                                                               |      |
| Sc Pol5 | 360 | AFKAVPGSYIGFCFSCNVMRTLINOSIISORVLNKISQLTLDIVKACREDSANRLVPCL     | 419  |
| Sp pol5 | 303 | ALDYVSSDNIGDIFSKNFLHCLINHLSEEDRYLYRAAKRVTISKLEXSKQ---NPTLVYI    | 359  |
|         |     | VI                                                              |      |
|         |     | pol5-2                                                          |      |
|         |     | S                                                               |      |
| Sc Pol5 | 420 | NAMLFGFHGSINFTKLTKSGVSKLIAIK-ELPSTVLAQLLDVFFLQLQ-----EFKGVL     | 473  |
| Sp pol5 | 360 | AIHLLGERGSLNFTRVINTKIVEHILPLADEQGILQLFOLLLSYVKRCPEDIASETKAVE    | 419  |
|         |     | pol5-1                                                          |      |
|         |     | E                                                               |      |
| Sp pol5 | 420 | WRRQWATDTMLSILRSKRSIKQBPWVREITRNIHCLMATLRYQQSEEVIPKPFSEGTQNMF   | 479  |
| Sc Pol5 | 530 | KERLYSILGELTINKEIRCK-DPEIN--SWQYLTIKLIDDIENSHVGLINPLDENLENI     | 586  |
| Sp pol5 | 480 | RLRLMSALSYLSSSAFQOSOTDHOLOGDNWPYVALNVILLELEKSPKNNILISMDESIVIEI  | 539  |
|         |     | III                                                             |      |
|         |     | pol5-2                                                          |      |
|         |     | S                                                               |      |
| Sc Pol5 | 587 | KNEAISCLSKVCR-----SRTASWGI STLISMCLVCIYAGD TDSISYIHELCE-----    | 634  |
| Sp pol5 | 540 | VOKSLSVLHKVTKKIDKKAQHLQLNAFQLLYSLVLLCVYAGD TDSILVLEDICNCYSKV    | 599  |
|         |     | I                                                               |      |
|         |     | pol5-1                                                          |      |
| Sc Pol5 | 635 | ---FSKHENNS-----MVGITEILLSLIAQKKALLRKLSLIIWQCFIEEVGLIHELQILLD   | 687  |
| Sp pol5 | 600 | FNKKSREKRESTSNEPTAMEIITEVMSLSISRPSILLRKLVEMLFTSFSEDMNRRESIHLICD | 659  |
| Sc Pol5 | 698 | ILKARENKQGFACIFEGEEFPERIKEENDASSEKSTGSESESESESDSDDADEKDERDE     | 747  |
| Sp pol5 | 660 | VLKAKESVKDSEGMFAGEEVEEDAFGETEMDEIDFEBIDTCEIEECSDWEMISNCDASD-    | 718  |
| Sc Pol5 | 748 | ANEDILNIDKEATSALVVMINLPDNIIVNDKGEVDLDQLEGLSDDGGDDEESMCDKMM      | 807  |
| Sp pol5 | 719 | ---NE---ELERKLDKVIEDADAKVKD---E-----ESSEBELMNDQML               | 754  |
|         |     | V                                                               |      |
| Sc Pol5 | 808 | ELDDCISEIFKRRKEALSSISTGNQRFKFEVKQSRENVISFKHRVVDMLAVVVKYCEKLT    | 867  |
| Sc Pol5 | 868 | ANKSEHSNNLGGSLSKLVYFIIIPMLKCVNETLDRFLADKISKLLKGIKFKIKVTAFKDMN   | 927  |
| Sp pol5 | 806 | -N-----NGLG-----PEFLIPLLEMILKTKHKVLEEKQAVFRNRLSKLWTEEKPS        | 853  |
| Sc Pol5 | 928 | KDIELMDLLKXTHKMLTSPKPGQHAAVFYSMCSTSSLFSLKLYVEIGGNDKIDELIDLYT    | 987  |
| Sp pol5 | 854 | K--NVLEALKKVHVLGK-----AS-LGSTGSSISQLLIKLLADTP---YLKEGVEVYL      | 902  |
| Sc Pol5 | 998 | ATTKEAMQ---KQKCGPNIFIDFINWLSK-----KCTVMDKE-----                 | 1022 |
| Sp pol5 | 903 | KSFLLIQEPSKSHYNANIFHDFINWCAQORLKHQQTSTAASSPKTGHH                |      |
